# Supplementary material for: Regional Climate Change Effects on the Viticulture in Portugal
Source: MDPI journal article supplement (doi:10.3390/environments10010005), 2022-12-22
Supplement: s1 [file s1]

## Supplementary Information

### Contents (in order of appearance)

**Table S1-S4** Expanses of suitable area and mean suitability in Portugal and five focal areas for the baseline period, and three future predictions under SSP3-7.0 (Tables S1&S2) and SSP5-8.5 (Tables S3&S4). Irrigation practices were assumed to be perpetuated unchanged (Tables S1&S3) or halted (Tables S2&S4). Changes (relative to the baseline with irrigation) are shown, too.

**Table S2** Expanses of suitable area and mean suitability in Portugal and five focal areas for the baseline period, and three future predictions under SSP3-7.0. Irrigation was assumed to be ceased across Portugal. Changes (relative to the baseline with irrigation) are shown, too.

**Table S3** Expanses of suitable area and mean suitability in Portugal and five focal areas for the baseline period, and three future predictions under SSP5-8.5. Irrigation practices were assumed to be perpetuated unchanged. Changes (relative to the baseline with irrigation) are shown, too.

**Table S4** Expanses of suitable area and mean suitability in Portugal and five focal areas for the baseline period, and three future predictions under SSP5-8.5. Irrigation was assumed to be ceased across Portugal. Changes (relative to the baseline with irrigation) are shown, too.

**Table S5&S6** 25<sup>th</sup>, 50<sup>th</sup>, and 75<sup>th</sup> percentiles across Portugal of the six climate variables, growing season (10 °C) heat sum, minimum and maximum temperature (TMIN and TMAX), GSHS, and the precipitation in spring, summer, and fall (PSpring, PSummer, PFall), for the baseline (1981—2010) and three future periods spanning from 2011 to 2100 under SSP3-7.0 (Table S5) and SSP5-8.5 (Table S6).

**Table S7-S16** 25<sup>th</sup>, 50<sup>th</sup>, and 75<sup>th</sup> percentiles in the five focal areas of the six climate variables, growing season (10 °C) heat sum, minimum and maximum temperature (TMIN and TMAX), and the precipitation in spring, summer, and fall (PSpring, PSummer, PFall), for the baseline (1981—2010) and three future periods spanning from 2011 to 2100 under SSP3-7.0 (odd number, e.g. Tables S7, S9,...) and SSP5-8.5 (even numbers, e.g. Table S8, S10, ...).

**Table S1.** Expanses of suitable area and mean suitability in Portugal and five focal areas for the baseline period, and three future predictions under SSP3-7.0 with irrigation continuing unchanged. Changes (relative to the baseline with irrigation) are shown, too.

| <b>Area</b>                  | <b>Period</b> | <b>Suitable Area<br/>(km<sup>2</sup>)</b> | <b>Area Change<br/>(%)</b> | <b>Mean<br/>Suitability</b> | <b>Suitability<br/>Change (%)</b> |
|------------------------------|---------------|-------------------------------------------|----------------------------|-----------------------------|-----------------------------------|
| <i>Portugal</i>              | 1981—2010     | 36,081                                    | n/a                        | 0.659                       | n/a                               |
|                              | 2011—2040     | 36,626                                    | 1.51                       | 0.637                       | -3.36                             |
|                              | 2041—2070     | 28,889                                    | -19.93                     | 0.599                       | -9.11                             |
|                              | 2071—2100     | 30,573                                    | -15.27                     | 0.618                       | -6.24                             |
| <i>Região<br/>Norte</i>      | 1981—2010     | 12,467                                    | n/a                        | 0.730                       | n/a                               |
|                              | 2011—2040     | 12,748                                    | 2.25                       | 0.658                       | -9.80                             |
|                              | 2041—2070     | 7,267                                     | -41.71                     | 0.560                       | -23.23                            |
|                              | 2071—2100     | 5,627                                     | -54.86                     | 0.587                       | -19.53                            |
| <i>Douro<br/>Wine Region</i> | 1981—2010     | 2,399                                     | n/a                        | 0.883                       | n/a                               |
|                              | 2011—2040     | 2,139                                     | -10.84                     | 0.679                       | -23.14                            |
|                              | 2041—2070     | 1,133                                     | -52.77                     | 0.560                       | -36.58                            |
|                              | 2071—2100     | 1,267                                     | -47.19                     | 0.601                       | -31.98                            |
| <i>Região<br/>Centro</i>     | 1981—2010     | 12,328                                    | n/a                        | 0.663                       | n/a                               |
|                              | 2011—2040     | 10,682                                    | -13.35                     | 0.645                       | -2.70                             |
|                              | 2041—2070     | 6,841                                     | -44.51                     | 0.697                       | 5.13                              |
|                              | 2071—2100     | 7,237                                     | -41.30                     | 0.753                       | 13.49                             |
| <i>Baixo<br/>Alentejo</i>    | 1981—2010     | 1,245                                     | n/a                        | 0.483                       | n/a                               |
|                              | 2011—2040     | 1,947                                     | 56.39                      | 0.604                       | 25.04                             |
|                              | 2041—2070     | 1,648                                     | 32.37                      | 0.484                       | 0.33                              |
|                              | 2071—2100     | 1,551                                     | 24.58                      | 0.479                       | -0.77                             |
| <i>Algarve</i>               | 1981—2010     | 683                                       | n/a                        | 0.530                       | n/a                               |
|                              | 2011—2040     | 1,278                                     | 87.12                      | 0.597                       | 12.63                             |
|                              | 2041—2070     | 1,474                                     | 115.81                     | 0.555                       | 4.86                              |
|                              | 2071—2100     | 2,229                                     | 226.35                     | 0.546                       | 3.12                              |

**Table S2.** Expanses of suitable area and mean suitability in Portugal and five focal areas for the baseline period, and three future predictions under SSP3-7.0 with irrigation being stopped. Changes (relative to the baseline with irrigation) are shown, too.

| Area                     | Period    | Suitable Area<br>(km <sup>2</sup> ) | Area Change<br>(%) | Mean<br>Suitability | Suitability<br>Change (%) |
|--------------------------|-----------|-------------------------------------|--------------------|---------------------|---------------------------|
| <i>Portugal</i>          | 1981—2010 | 11,512                              | -68.09             | 0.594               | -9.76                     |
|                          | 2011—2040 | 10,215                              | -71.69             | 0.529               | -19.70                    |
|                          | 2041—2070 | 10,832                              | -69.98             | 0.538               | -18.32                    |
|                          | 2071—2100 | 13,409                              | -62.84             | 0.587               | -10.86                    |
| <i>Região Norte</i>      | 1981—2010 | 4,721                               | -62.13             | 0.616               | -15.61                    |
|                          | 2011—2040 | 1,973                               | -84.17             | 0.479               | -34.43                    |
|                          | 2041—2070 | 617                                 | -95.05             | 0.505               | -30.82                    |
|                          | 2071—2100 | 976                                 | -92.17             | 0.499               | -31.65                    |
| <i>Douro Wine Region</i> | 1981—2010 | 2,076                               | -13.46             | 0.669               | -24.27                    |
|                          | 2011—2040 | 814                                 | -66.07             | 0.478               | -45.93                    |
|                          | 2041—2070 | 224                                 | -90.66             | 0.507               | -42.58                    |
|                          | 2071—2100 | 346                                 | -85.58             | 0.516               | -41.59                    |
| <i>Região Centro</i>     | 1981—2010 | 4,510                               | -63.42             | 0.617               | -7.04                     |
|                          | 2011—2040 | 4,343                               | -64.77             | 0.551               | -16.92                    |
|                          | 2041—2070 | 4,401                               | -64.30             | 0.584               | -11.94                    |
|                          | 2071—2100 | 5,608                               | -54.51             | 0.682               | 2.86                      |
| <i>Baixo Alentejo</i>    | 1981—2010 | 42                                  | -96.63             | 0.395               | -18.23                    |
|                          | 2011—2040 | 628                                 | -49.56             | 0.512               | 5.97                      |
|                          | 2041—2070 | 829                                 | -33.41             | 0.430               | -10.92                    |
|                          | 2071—2100 | 964                                 | -22.57             | 0.441               | -8.65                     |
| <i>Algarve</i>           | 1981—2010 | 36                                  | -94.73             | 0.436               | -17.64                    |
|                          | 2011—2040 | 173                                 | -74.67             | 0.433               | -18.28                    |
|                          | 2041—2070 | 237                                 | -65.30             | 0.421               | -20.53                    |
|                          | 2071—2100 | 283                                 | -58.57             | 0.414               | -21.85                    |

**Table S3.** Expanses of suitable area and mean suitability in Portugal and five focal areas for the baseline period, and three future predictions under SSP5-8.5 with irrigation continuing unchanged. Changes (relative to the baseline with irrigation) are shown, too.

| Area                     | Period    | Suitable Area<br>(km <sup>2</sup> ) | Area Change<br>(%) | Mean<br>Suitability | Suitability<br>Change (%) |
|--------------------------|-----------|-------------------------------------|--------------------|---------------------|---------------------------|
| <i>Portugal</i>          | 1981—2010 | 36,081                              | n/a                | 0.659               | n/a                       |
|                          | 2011—2040 | 29,763                              | -17.51             | 0.626               | -4.92                     |
|                          | 2041—2070 | 30,218                              | -16.25             | 0.602               | -8.66                     |
|                          | 2071—2100 | 37,727                              | 4.56               | 0.635               | -3.67                     |
| <i>Região Norte</i>      | 1981—2010 | 12,467                              | n/a                | 0.730               | n/a                       |
|                          | 2011—2040 | 11,136                              | -10.68             | 0.657               | -9.95                     |
|                          | 2041—2070 | 7,548                               | -39.46             | 0.570               | -21.91                    |
|                          | 2071—2100 | 6,450                               | -48.26             | 0.605               | -17.14                    |
| <i>Douro Wine Region</i> | 1981—2010 | 2,399                               | n/a                | 0.883               | n/a                       |
|                          | 2011—2040 | 2,156                               | -10.13             | 0.672               | -23.88                    |
|                          | 2041—2070 | 1,042                               | -56.57             | 0.580               | -34.34                    |
|                          | 2071—2100 | 1,822                               | -24.05             | 0.596               | -32.52                    |
| <i>Região Centro</i>     | 1981—2010 | 12,328                              | n/a                | 0.663               | n/a                       |
|                          | 2011—2040 | 9,165                               | -25.66             | 0.632               | -4.72                     |
|                          | 2041—2070 | 6,831                               | -44.59             | 0.697               | 5.05                      |
|                          | 2071—2100 | 10,113                              | -17.97             | 0.711               | 7.20                      |
| <i>Baixo Alentejo</i>    | 1981—2010 | 1,245                               | n/a                | 0.483               | n/a                       |
|                          | 2011—2040 | 1,602                               | 28.67              | 0.558               | 15.51                     |
|                          | 2041—2070 | 1,559                               | 25.22              | 0.486               | 0.69                      |
|                          | 2071—2100 | 2,339                               | 87.87              | 0.505               | 4.68                      |
| <i>Algarve</i>           | 1981—2010 | 683                                 | n/a                | 0.530               | n/a                       |
|                          | 2011—2040 | 778                                 | 13.90              | 0.595               | 12.23                     |
|                          | 2041—2070 | 1,859                               | 172.18             | 0.580               | 9.40                      |
|                          | 2071—2100 | 2,508                               | 267.20             | 0.537               | 1.42                      |

**Table S4.** Expanses of suitable area and mean suitability in Portugal and five focal areas for the baseline period, and three future predictions under SSP5-8.5 with irrigation being stopped. Changes (relative to the baseline with irrigation) are shown, too.

| <b>Area</b>                  | <b>Period</b> | <b>Suitable Area<br/>(km<sup>2</sup>)</b> | <b>Area Change<br/>(%)</b> | <b>Mean<br/>Suitability</b> | <b>Suitability<br/>Change (%)</b> |
|------------------------------|---------------|-------------------------------------------|----------------------------|-----------------------------|-----------------------------------|
| <i>Portugal</i>              | 1981—2010     | 11,512                                    | -68.09                     | 0.594                       | -9.76                             |
|                              | 2011—2040     | 7,373                                     | -79.57                     | 0.507                       | -23.11                            |
|                              | 2041—2070     | 11,079                                    | -69.29                     | 0.528                       | -19.86                            |
|                              | 2071—2100     | 21,071                                    | -41.60                     | 0.582                       | -11.70                            |
| <i>Região<br/>Norte</i>      | 1981—2010     | 4,721                                     | -62.13                     | 0.616                       | -15.61                            |
|                              | 2011—2040     | 1,700                                     | -86.36                     | 0.470                       | -35.51                            |
|                              | 2041—2070     | 689                                       | -94.47                     | 0.502                       | -31.18                            |
|                              | 2071—2100     | 2,012                                     | -83.84                     | 0.523                       | -28.31                            |
| <i>Douro<br/>Wine Region</i> | 1981—2010     | 2,076                                     | -13.46                     | 0.669                       | -24.27                            |
|                              | 2011—2040     | 855                                       | -64.36                     | 0.477                       | -45.99                            |
|                              | 2041—2070     | 231                                       | -90.37                     | 0.566                       | -35.92                            |
|                              | 2071—2100     | 523                                       | -78.20                     | 0.487                       | -44.87                            |
| <i>Região<br/>Centro</i>     | 1981—2010     | 4,510                                     | -63.42                     | 0.617                       | -7.04                             |
|                              | 2011—2040     | 3,507                                     | -71.55                     | 0.527                       | -20.57                            |
|                              | 2041—2070     | 4,303                                     | -65.10                     | 0.569                       | -14.25                            |
|                              | 2071—2100     | 8,541                                     | -30.72                     | 0.654                       | -1.41                             |
| <i>Baixo<br/>Alentejo</i>    | 1981—2010     | 42                                        | -96.63                     | 0.395                       | -18.23                            |
|                              | 2011—2040     | 315                                       | -74.70                     | 0.430                       | -10.99                            |
|                              | 2041—2070     | 676                                       | -45.70                     | 0.434                       | -10.11                            |
|                              | 2071—2100     | 1,679                                     | 34.86                      | 0.471                       | -2.52                             |
| <i>Algarve</i>               | 1981—2010     | 36                                        | -94.73                     | 0.436                       | -17.64                            |
|                              | 2011—2040     | 110                                       | -83.89                     | 0.450                       | -15.02                            |
|                              | 2041—2070     | 398                                       | -41.73                     | 0.436                       | -17.65                            |
|                              | 2071—2100     | 300                                       | -56.08                     | 0.426                       | -19.61                            |

**Table S5.** 25<sup>th</sup>, 50<sup>th</sup>, and 75<sup>th</sup> percentiles across Portugal of the six climate variables, growing season (10 °C) heat sum, minimum and maximum temperature (TMIN and TMAX), GSHS, and the precipitation in spring, summer, and fall (PSpring, PSummer, PFall), for the baseline (1981—2010) and three future periods spanning from 2011 to 2100 under SSP3-7.0.

| Variable        | Percentile | 1981—2010 | 2011—2040 | 2041—2070 | 2071—2100 |
|-----------------|------------|-----------|-----------|-----------|-----------|
| TMIN<br>(°C)    | 25         | 2.5       | 3.2       | 4.0       | 5.4       |
|                 | 50         | 4.7       | 5.3       | 6.2       | 7.3       |
|                 | 75         | 5.8       | 6.3       | 7.3       | 8.4       |
| TMAX<br>(°C)    | 25         | 26.8      | 28.6      | 30.5      | 31.8      |
|                 | 50         | 28.8      | 30.8      | 33.0      | 34.4      |
|                 | 75         | 31.4      | 32.8      | 34.9      | 36.2      |
| GSHS<br>(°C)    | 25         | 1,629     | 1,927     | 2,238     | 2,828     |
|                 | 50         | 2,082     | 2,362     | 2,658     | 3,220     |
|                 | 75         | 2,375     | 2,664     | 2,979     | 3,569     |
| PSpring<br>(mm) | 25         | 172       | 143       | 145       | 131       |
|                 | 50         | 200       | 169       | 173       | 157       |
|                 | 75         | 280       | 240       | 252       | 230       |
| PSummer<br>(mm) | 25         | 68        | 65        | 59        | 56        |
|                 | 50         | 91        | 90        | 82        | 80        |
|                 | 75         | 139       | 137       | 124       | 123       |
| PFall<br>(mm)   | 25         | 123       | 118       | 90        | 86        |
|                 | 50         | 149       | 140       | 106       | 104       |
|                 | 75         | 218       | 199       | 152       | 157       |

**Table S6.** 25<sup>th</sup>, 50<sup>th</sup>, and 75<sup>th</sup> percentiles across Portugal of the six climate variables, growing season (10 °C) heat sum, minimum and maximum temperature (TMIN and TMAX), and the precipitation in spring, summer, and fall (PSpring, PSummer, PFall), for the baseline (1981—2010) and three future periods spanning from 2011 to 2100 under SSP5-8.5.

| Variable        | Percentile | 1981—2010 | 2011—2040 | 2041—2070 | 2071—2100 |
|-----------------|------------|-----------|-----------|-----------|-----------|
| TMIN<br>(°C)    | 25         | 2.5       | 2.9       | 4.3       | 6.2       |
|                 | 50         | 4.7       | 4.9       | 6.2       | 8.1       |
|                 | 75         | 5.8       | 6.1       | 7.2       | 9.3       |
| TMAX<br>(°C)    | 25         | 26.8      | 28.6      | 30.8      | 33.0      |
|                 | 50         | 28.8      | 30.8      | 33.2      | 35.7      |
|                 | 75         | 31.4      | 32.8      | 35.0      | 37.9      |
| GSHS<br>(°C)    | 25         | 1,629     | 1,895     | 2,389     | 3,258     |
|                 | 50         | 2,082     | 2,300     | 2,797     | 3,594     |
|                 | 75         | 2,375     | 2,606     | 3,121     | 3,973     |
| PSpring<br>(mm) | 25         | 172       | 154       | 135       | 124       |
|                 | 50         | 200       | 182       | 161       | 150       |
|                 | 75         | 280       | 263       | 239       | 222       |
| PSummer<br>(mm) | 25         | 68        | 61        | 57        | 57        |
|                 | 50         | 91        | 87        | 84        | 84        |
|                 | 75         | 139       | 136       | 131       | 131       |
| PFall<br>(mm)   | 25         | 123       | 113       | 94        | 68        |
|                 | 50         | 149       | 131       | 111       | 85        |
|                 | 75         | 218       | 182       | 160       | 126       |

**Table S7.** 25<sup>th</sup>, 50<sup>th</sup>, and 75<sup>th</sup> percentiles in Região Norte of the six climate variables, growing season (10 °C) heat sum, minimum and maximum temperature (TMIN and TMAX), and the precipitation in spring, summer, and fall (PSpring, PSummer, PFall), for the baseline (1981—2010) and three future periods spanning from 2011 to 2100 under SSP3-7.0.

| Variable        | Percentile | 1981—2010 | 2011—2040 | 2041—2070 | 2071—2100 |
|-----------------|------------|-----------|-----------|-----------|-----------|
| TMIN<br>(°C)    | 25         | 0.9       | 1.7       | 2.1       | 3.8       |
|                 | 50         | 1.7       | 2.5       | 3.0       | 4.6       |
|                 | 75         | 2.9       | 3.7       | 4.4       | 5.7       |
| TMAX<br>(°C)    | 25         | 25.4      | 27.2      | 29.1      | 30.6      |
|                 | 50         | 26.6      | 28.8      | 31.5      | 33.2      |
|                 | 75         | 27.9      | 30.5      | 33.4      | 35.1      |
| GSHS<br>(°C)    | 25         | 1,249     | 1,526     | 1,821     | 2,375     |
|                 | 50         | 1,490     | 1,787     | 2,101     | 2,686     |
|                 | 75         | 1,722     | 2,019     | 2,332     | 2,926     |
| PSpring<br>(mm) | 25         | 209       | 177       | 188       | 173       |
|                 | 50         | 321       | 282       | 298       | 274       |
|                 | 75         | 419       | 375       | 392       | 360       |
| PSummer<br>(mm) | 25         | 123       | 121       | 110       | 110       |
|                 | 50         | 167       | 165       | 151       | 151       |
|                 | 75         | 203       | 202       | 185       | 182       |
| PFall<br>(mm)   | 25         | 181       | 167       | 125       | 128       |
|                 | 50         | 268       | 247       | 193       | 193       |
|                 | 75         | 333       | 302       | 240       | 240       |

**Table S8.** 25<sup>th</sup>, 50<sup>th</sup>, and 75<sup>th</sup> percentiles in Região Norte of the six climate variables, growing season (10 °C) heat sum, minimum and maximum temperature (TMIN and TMAX), and the precipitation in spring, summer, and fall (PSpring, PSummer, PFall), for the baseline (1981—2010) and three future periods spanning from 2011 to 2100 under SSP5-8.5.

| Variable        | Percentile | 1981—2010 | 2011—2040 | 2041—2070 | 2071—2100 |
|-----------------|------------|-----------|-----------|-----------|-----------|
| TMIN<br>(°C)    | 25         | 0.9       | 1.2       | 2.4       | 4.3       |
|                 | 50         | 1.7       | 2.0       | 3.3       | 5.3       |
|                 | 75         | 2.9       | 3.3       | 4.7       | 6.6       |
| TMAX<br>(°C)    | 25         | 25.4      | 27.2      | 29.4      | 31.8      |
|                 | 50         | 26.6      | 28.8      | 31.6      | 35.0      |
|                 | 75         | 27.9      | 30.5      | 33.5      | 37.0      |
| GSHS<br>(°C)    | 25         | 1,249     | 1,508     | 1,970     | 2,807     |
|                 | 50         | 1,490     | 1,761     | 2,253     | 3,131     |
|                 | 75         | 1,722     | 1,978     | 2,485     | 3,370     |
| PSpring<br>(mm) | 25         | 209       | 194       | 179       | 169       |
|                 | 50         | 321       | 306       | 285       | 269       |
|                 | 75         | 419       | 410       | 378       | 348       |
| PSummer<br>(mm) | 25         | 123       | 119       | 118       | 118       |
|                 | 50         | 167       | 165       | 161       | 161       |
|                 | 75         | 203       | 203       | 194       | 194       |
| PFall<br>(mm)   | 25         | 181       | 148       | 132       | 105       |
|                 | 50         | 268       | 221       | 200       | 160       |
|                 | 75         | 333       | 276       | 246       | 195       |

**Table S9.** 25<sup>th</sup>, 50<sup>th</sup>, and 75<sup>th</sup> percentiles in the Douro wine region of the six climate variables, growing season (10 °C) heat sum, minimum and maximum temperature (TMIN and TMAX), and the precipitation in spring, summer, and fall (PSpring, PSummer, PFall), for the baseline (1981—2010) and three future periods spanning from 2011 to 2100 under SSP3-7.0.

| Variable        | Percentile | 1981—2010 | 2011—2040 | 2041—2070 | 2071—2100 |
|-----------------|------------|-----------|-----------|-----------|-----------|
| TMIN<br>(°C)    | 25         | 1.5       | 2.3       | 2.9       | 4.5       |
|                 | 50         | 2.0       | 2.8       | 3.5       | 4.9       |
|                 | 75         | 2.5       | 3.3       | 4.1       | 5.4       |
| TMAX<br>(°C)    | 25         | 27.7      | 30.4      | 33.3      | 35.0      |
|                 | 50         | 28.6      | 31.3      | 34.2      | 35.9      |
|                 | 75         | 29.5      | 32.2      | 35.1      | 36.8      |
| GSHS<br>(°C)    | 25         | 1,505     | 1,837     | 2,184     | 2,813     |
|                 | 50         | 1,691     | 2,035     | 2,388     | 3,034     |
|                 | 75         | 1,897     | 2,252     | 2,615     | 3,290     |
| PSpring<br>(mm) | 25         | 148       | 124       | 131       | 120       |
|                 | 50         | 168       | 142       | 150       | 137       |
|                 | 75         | 201       | 172       | 182       | 167       |
| PSummer<br>(mm) | 25         | 88        | 86        | 79        | 78        |
|                 | 50         | 96        | 94        | 86        | 85        |
|                 | 75         | 107       | 105       | 96        | 95        |
| PFall<br>(mm)   | 25         | 130       | 121       | 89        | 93        |
|                 | 50         | 144       | 134       | 99        | 103       |
|                 | 75         | 167       | 155       | 117       | 119       |

**Table S10.** 25<sup>th</sup>, 50<sup>th</sup>, and 75<sup>th</sup> percentiles in the Douro wine region of the six climate variables, growing season (10 °C) heat sum, minimum and maximum temperature (TMIN and TMAX), and the precipitation in spring, summer, and fall (PSpring, PSummer, PFall), for the baseline (1981—2010) and three future periods spanning from 2011 to 2100 under SSP5-8.5.

| Variable        | Percentile | 1981—2010 | 2011—2040 | 2041—2070 | 2071—2100 |
|-----------------|------------|-----------|-----------|-----------|-----------|
| TMIN<br>(°C)    | 25         | 1.5       | 1.9       | 3.2       | 5.2       |
|                 | 50         | 2.0       | 2.4       | 3.8       | 5.8       |
|                 | 75         | 2.5       | 2.8       | 4.4       | 6.4       |
| TMAX<br>(°C)    | 25         | 27.7      | 30.3      | 33.3      | 37.0      |
|                 | 50         | 28.6      | 31.2      | 34.2      | 37.8      |
|                 | 75         | 29.5      | 32.1      | 35.1      | 38.7      |
| GSHS<br>(°C)    | 25         | 1,505     | 1,825     | 2,352     | 3,326     |
|                 | 50         | 1,691     | 2,019     | 2,560     | 3,562     |
|                 | 75         | 1,897     | 2,233     | 2,789     | 3,828     |
| PSpring<br>(mm) | 25         | 148       | 135       | 124       | 117       |
|                 | 50         | 168       | 155       | 142       | 134       |
|                 | 75         | 201       | 188       | 174       | 162       |
| PSummer<br>(mm) | 25         | 88        | 85        | 84        | 84        |
|                 | 50         | 96        | 93        | 92        | 92        |
|                 | 75         | 107       | 104       | 102       | 102       |
| PFall<br>(mm)   | 25         | 130       | 108       | 95        | 76        |
|                 | 50         | 144       | 119       | 105       | 84        |
|                 | 75         | 167       | 137       | 123       | 98        |

**Table S11.** 25<sup>th</sup>, 50<sup>th</sup>, and 75<sup>th</sup> percentiles in Região Centro of the six climate variables, growing season (10 °C) heat sum, minimum and maximum temperature (TMIN and TMAX), and the precipitation in spring, summer, and fall (PSpring, PSummer, PFall), for the baseline (1981—2010) and three future periods spanning from 2011 to 2100 under SSP3-7.0.

| Variable        | Percentile | 1981—2010 | 2011—2040 | 2041—2070 | 2071—2100 |
|-----------------|------------|-----------|-----------|-----------|-----------|
| TMIN<br>(°C)    | 25         | 2.4       | 3.1       | 3.8       | 5.2       |
|                 | 50         | 3.7       | 4.3       | 5.2       | 6.4       |
|                 | 75         | 5.0       | 5.5       | 6.5       | 7.6       |
| TMAX<br>(°C)    | 25         | 26.7      | 28.4      | 30.2      | 31.6      |
|                 | 50         | 28.0      | 30.0      | 32.3      | 33.8      |
|                 | 75         | 29.2      | 31.5      | 34.2      | 35.8      |
| GSHS<br>(°C)    | 25         | 1,566     | 1,867     | 2,180     | 2,771     |
|                 | 50         | 1,861     | 2,147     | 2,452     | 3,042     |
|                 | 75         | 2,065     | 2,343     | 2,641     | 3,222     |
| PSpring<br>(mm) | 25         | 206       | 173       | 180       | 165       |
|                 | 50         | 255       | 217       | 226       | 206       |
|                 | 75         | 303       | 260       | 272       | 249       |
| PSummer<br>(mm) | 25         | 100       | 100       | 90        | 87        |
|                 | 50         | 121       | 121       | 109       | 106       |
|                 | 75         | 146       | 144       | 130       | 128       |
| PFall<br>(mm)   | 25         | 159       | 148       | 112       | 112       |
|                 | 50         | 192       | 175       | 134       | 135       |
|                 | 75         | 230       | 210       | 161       | 166       |

**Table S12.** 25<sup>th</sup>, 50<sup>th</sup>, and 75<sup>th</sup> percentiles in Região Centro of the six climate variables, growing season (10 °C) heat sum, minimum and maximum temperature (TMIN and TMAX), and the precipitation in spring, summer, and fall (PSpring, PSummer, PFall), for the baseline (1981—2010) and three future periods spanning from 2011 to 2100 under SSP5-8.5.

| Variable        | Percentile | 1981—2010 | 2011—2040 | 2041—2070 | 2071—2100 |
|-----------------|------------|-----------|-----------|-----------|-----------|
| TMIN<br>(°C)    | 25         | 2.4       | 2.7       | 4.2       | 6.1       |
|                 | 50         | 3.7       | 4.0       | 5.4       | 7.3       |
|                 | 75         | 5.0       | 5.3       | 6.5       | 8.5       |
| TMAX<br>(°C)    | 25         | 26.7      | 28.4      | 30.5      | 32.8      |
|                 | 50         | 28.0      | 30.0      | 32.5      | 35.4      |
|                 | 75         | 29.2      | 31.4      | 34.2      | 37.7      |
| GSHS<br>(°C)    | 25         | 1,566     | 1,839     | 2,333     | 3,208     |
|                 | 50         | 1,861     | 2,091     | 2,600     | 3,452     |
|                 | 75         | 2,065     | 2,275     | 2,785     | 3,649     |
| PSpring<br>(mm) | 25         | 206       | 189       | 168       | 158       |
|                 | 50         | 255       | 238       | 213       | 196       |
|                 | 75         | 303       | 286       | 259       | 239       |
| PSummer<br>(mm) | 25         | 100       | 97        | 92        | 92        |
|                 | 50         | 121       | 119       | 112       | 112       |
|                 | 75         | 146       | 143       | 136       | 136       |
| PFall<br>(mm)   | 25         | 159       | 135       | 118       | 92        |
|                 | 50         | 192       | 160       | 140       | 108       |
|                 | 75         | 230       | 192       | 169       | 133       |

**Table S13.** 25<sup>th</sup>, 50<sup>th</sup>, and 75<sup>th</sup> percentiles in Baixo Alentejo of the six climate variables, growing season (10 °C) heat sum, minimum and maximum temperature (TMIN and TMAX), and the precipitation in spring, summer, and fall (PSpring, PSummer, PFall), for the baseline (1981—2010) and three future periods spanning from 2011 to 2100 under SSP3-7.0.

| Variable        | Percentile | 1981—2010 | 2011—2040 | 2041—2070 | 2071—2100 |
|-----------------|------------|-----------|-----------|-----------|-----------|
| TMIN<br>(°C)    | 25         | 5.1       | 5.7       | 6.7       | 7.7       |
|                 | 50         | 5.3       | 5.9       | 6.9       | 7.9       |
|                 | 75         | 5.5       | 6.1       | 7.1       | 8.1       |
| TMAX<br>(°C)    | 25         | 31.3      | 32.1      | 33.5      | 34.5      |
|                 | 50         | 31.8      | 33.1      | 34.9      | 35.9      |
|                 | 75         | 32.5      | 33.8      | 35.8      | 36.9      |
| GSHS<br>(°C)    | 25         | 2,382     | 2,646     | 2,938     | 3,449     |
|                 | 50         | 2,498     | 2,807     | 3,157     | 3,729     |
|                 | 75         | 2,605     | 2,931     | 3,310     | 3,906     |
| PSpring<br>(mm) | 25         | 152       | 126       | 125       | 110       |
|                 | 50         | 161       | 134       | 133       | 118       |
|                 | 75         | 174       | 145       | 143       | 126       |
| PSummer<br>(mm) | 25         | 53        | 51        | 46        | 44        |
|                 | 50         | 57        | 55        | 50        | 48        |
|                 | 75         | 63        | 61        | 55        | 53        |
| PFall<br>(mm)   | 25         | 104       | 104       | 81        | 74        |
|                 | 50         | 111       | 111       | 87        | 80        |
|                 | 75         | 121       | 121       | 94        | 86        |

**Table S14.** 25<sup>th</sup>, 50<sup>th</sup>, and 75<sup>th</sup> percentiles in Baixo Alentejo of the six climate variables, growing season (10 °C) heat sum, minimum and maximum temperature (TMIN and TMAX), and the precipitation in spring, summer, and fall (PSpring, PSummer, PFall), for the baseline (1981—2010) and three future periods spanning from 2011 to 2100 under SSP5-8.5.

| Variable        | Percentile | 1981—2010 | 2011—2040 | 2041—2070 | 2071—2100 |
|-----------------|------------|-----------|-----------|-----------|-----------|
| TMIN<br>(°C)    | 25         | 5.1       | 5.4       | 6.6       | 8.6       |
|                 | 50         | 5.3       | 5.7       | 6.8       | 8.8       |
|                 | 75         | 5.5       | 5.9       | 7.0       | 9.0       |
| TMAX<br>(°C)    | 25         | 31.3      | 32.3      | 33.8      | 35.4      |
|                 | 50         | 31.8      | 33.3      | 35.1      | 37.0      |
|                 | 75         | 32.5      | 33.9      | 35.9      | 38.4      |
| GSHS<br>(°C)    | 25         | 2,382     | 2,596     | 3,054     | 3,769     |
|                 | 50         | 2,498     | 2,770     | 3,293     | 4,110     |
|                 | 75         | 2,605     | 2,915     | 3,450     | 4,328     |
| PSpring<br>(mm) | 25         | 152       | 132       | 114       | 106       |
|                 | 50         | 161       | 141       | 122       | 113       |
|                 | 75         | 174       | 152       | 131       | 122       |
| PSummer<br>(mm) | 25         | 53        | 48        | 45        | 45        |
|                 | 50         | 57        | 51        | 49        | 49        |
|                 | 75         | 63        | 57        | 54        | 54        |
| PFall<br>(mm)   | 25         | 104       | 103       | 81        | 59        |
|                 | 50         | 111       | 111       | 87        | 64        |
|                 | 75         | 121       | 121       | 96        | 69        |

**Table S15.** 25<sup>th</sup>, 50<sup>th</sup>, and 75<sup>th</sup> percentiles in the Algarve of the six climate variables, growing season (10 °C) heat sum, minimum and maximum temperature (TMIN and TMAX), and the precipitation in spring, summer, and fall (PSpring, PSummer, PFall), for the baseline (1981—2010) and three future periods spanning from 2011 to 2100 under SSP3-7.0.

| Variable        | Percentile | 1981—2010 | 2011—2040 | 2041—2070 | 2071—2100 |
|-----------------|------------|-----------|-----------|-----------|-----------|
| TMIN<br>(°C)    | 25         | 5.9       | 6.5       | 7.5       | 8.6       |
|                 | 50         | 7.1       | 7.8       | 8.8       | 9.8       |
|                 | 75         | 8.8       | 9.4       | 10.3      | 11.4      |
| TMAX<br>(°C)    | 25         | 27.7      | 28.4      | 29.7      | 30.6      |
|                 | 50         | 30.4      | 31.0      | 32.4      | 33.3      |
|                 | 75         | 31.6      | 32.1      | 33.6      | 34.4      |
| GSHS<br>(°C)    | 25         | 2,366     | 2,606     | 2,866     | 3,351     |
|                 | 50         | 2,526     | 2,784     | 3,064     | 3,561     |
|                 | 75         | 2,696     | 2,960     | 3,260     | 3,784     |
| PSpring<br>(mm) | 25         | 168       | 140       | 136       | 119       |
|                 | 50         | 198       | 166       | 160       | 143       |
|                 | 75         | 222       | 187       | 179       | 162       |
| PSummer<br>(mm) | 25         | 46        | 43        | 40        | 38        |
|                 | 50         | 52        | 49        | 45        | 43        |
|                 | 75         | 57        | 54        | 49        | 47        |
| PFall<br>(mm)   | 25         | 108       | 107       | 87        | 78        |
|                 | 50         | 113       | 112       | 92        | 83        |
|                 | 75         | 121       | 120       | 98        | 89        |

**Table S16.** 25<sup>th</sup>, 50<sup>th</sup>, and 75<sup>th</sup> percentiles in the Algarve of the six climate variables, growing season (10 °C) heat sum, minimum and maximum temperature (TMIN and TMAX), and the precipitation in spring, summer, and fall (PSpring, PSummer, PFall), for the baseline (1981—2010) and three future periods spanning from 2011 to 2100 under SSP5-8.5.

| Variable        | Percentile | 1981—2010 | 2011—2040 | 2041—2070 | 2071—2100 |
|-----------------|------------|-----------|-----------|-----------|-----------|
| TMIN<br>(°C)    | 25         | 5.9       | 6.4       | 7.4       | 9.4       |
|                 | 50         | 7.1       | 7.6       | 8.7       | 10.7      |
|                 | 75         | 8.8       | 9.3       | 10.3      | 12.2      |
| TMAX<br>(°C)    | 25         | 27.7      | 28.7      | 29.9      | 31.3      |
|                 | 50         | 30.4      | 31.3      | 32.6      | 34.1      |
|                 | 75         | 31.6      | 32.4      | 33.7      | 35.3      |
| GSHS<br>(°C)    | 25         | 2,366     | 2,551     | 2,977     | 3,639     |
|                 | 50         | 2,526     | 2,737     | 3,178     | 3,855     |
|                 | 75         | 2,696     | 2,918     | 3,384     | 4,123     |
| PSpring<br>(mm) | 25         | 168       | 142       | 124       | 116       |
|                 | 50         | 198       | 169       | 148       | 137       |
|                 | 75         | 222       | 192       | 167       | 154       |
| PSummer<br>(mm) | 25         | 46        | 41        | 39        | 39        |
|                 | 50         | 52        | 46        | 44        | 44        |
|                 | 75         | 57        | 50        | 48        | 48        |
| PFall<br>(mm)   | 25         | 108       | 108       | 85        | 60        |
|                 | 50         | 113       | 114       | 89        | 64        |
|                 | 75         | 121       | 122       | 95        | 68        |
